# Supplementary material
Source: publisher figshare collection journal article supplement (https://acs.figshare.com/ndownloader/files/13986425)
Supplement: Supplementary file 1 [file 13986425]

## **Supplementary Information:**

# **Nickel-Salen Type Polymer as Conducting Agent and Binder for Carbon-Free Cathodes in Lithium-Ion Batteries**

**Cody O'Meara,<sup>a</sup> Mikhail P. Karushev,<sup>b</sup> Iuliia A. Polozhentceva,<sup>b</sup> Sajith Dharmasena,<sup>a</sup>  
Hanna Cho,<sup>a</sup> Benjamin J. Yurkovich,<sup>a,b</sup> Sam Kogan,<sup>b</sup> Jung-Hyun Kim<sup>a,\*</sup>**

*<sup>a</sup>Center for Automotive Research, Department of Mechanical and Aerospace Engineering, The Ohio State University, Columbus, Ohio 43210, USA*

*<sup>b</sup>Powermer Inc., Westerville, Ohio 43082, USA*

## 1. CV profile of a poly[Ni(CH<sub>3</sub>-Salen)]

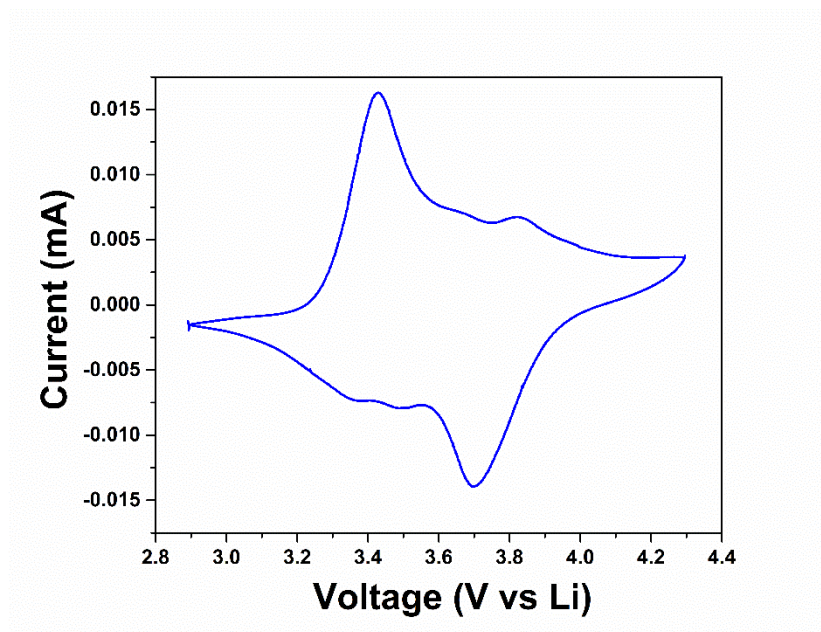

**Figure S1.** Representative CV profile of poly[Ni(CH<sub>3</sub>-Salen)] measured by using a scan rate of 10 mV/s in a voltage range of 2.9 – 4.3 V at room temperature.

Figure S1 shows a representative CV profile of the poly[Ni(CH<sub>3</sub>-Salen)] prepared by a polymerization of [Ni(CH<sub>3</sub>-Salen)] on electron-conducting electrodes. Most of the redox occurs within the voltage range of conventional Li-ion battery cathode materials, including LiFePO<sub>4</sub> used in this study. The details of redox mechanism have been recently reported by Dmitrieva et al.<sup>1</sup>

---

(1) Dmitrieva, E.; Rosenkranz, M.; Danilova, J. S.; Smirnova, E. A.; Karushev, M. P.; Chepurnaya, I. A.; Timonov, A. M. *Electrochimica Acta* 2018, 283, 1742–1752.

## 2. Full-cell performance of a poly[Ni(CH<sub>3</sub>-Salen)]

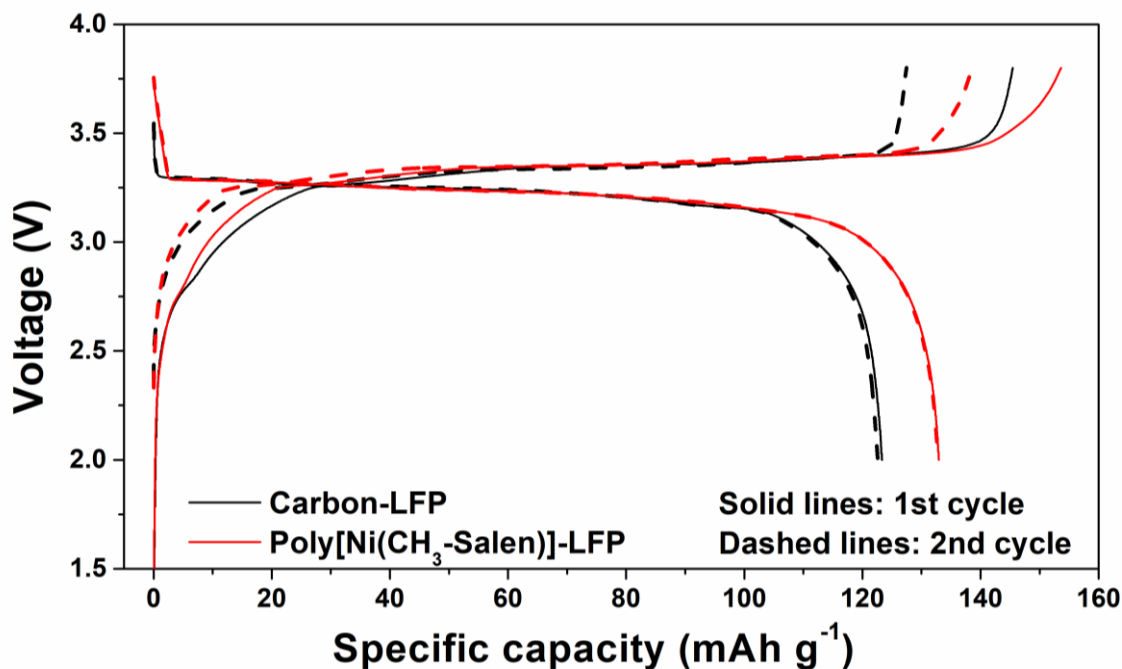

**Figure S2.** Charge-discharge profiles of full-cells prepared by pairing Poly[Ni(CH<sub>3</sub>-Salen)]-LFP or Carbon-LFP cathodes with graphite anodes. The specific capacity values are determined based on the masses of the entire cathodes (but excluding Al-foil).

Figure S2 plots two first consecutive C/10-rate charge-discharge cycles for full cells with Poly[Ni(CH<sub>3</sub>-Salen)]-LFP and Carbon-LFP electrodes. The formation of SEI on the graphite can clearly be observed during 1<sup>st</sup> charge (at around 2.8 V full-cell voltage). The 2<sup>nd</sup> cycle discharge-capacities are, respectively, 132.8 mAh/g for Poly[Ni(CH<sub>3</sub>-Salen)]-LFP and 123.3 mAh/g for Carbon-LFP. The capacity improvement due to the polymer has been also observed, as seen from the half cells (using Li-metal anodes).
